# Supplementary material
Source: PubMed Central journal article supplement (PMC7960393)
Supplement: 16-01139.pdf [file 16-01139.pdf]

## ON-LINE APPENDIX

The histogram features calculated in this study consisted of the mean, median, SD, range, geometric mean, and harmonic mean of the ROI, which are space-invariant.

In contrast to the histogram features, the GLCM features are highly spatially dependent. The GLCM is square and symmetric with rows and columns from zero to Ng, where Ng represents the number of gray tones in the image. This notation allows the GLCM element in row  $i$  and column  $j$  to represent the number of times a given gray tone of value  $i$  is horizontally adjacent to gray tone  $j$  in the original quantized image. Herein, GLCMs were calculated by using only directly adjacent pixels for simplicity, and they used the built-in Matlab function, Graycomatrix. Horizontal, 45°, vertical, and 135° directions were averaged to eliminate any directional dependence.

In addition, the GLRL matrix provides additional insight into a spatial dependence and was created on the basis of the published work of Tang.<sup>22</sup> The images were requantized in the texture analysis program by using a standard of 30 gray levels. No smoothing filter was applied to the images in the texture analysis program. The images were normalized by the mean and SD to minimize discrimination by the overall gray-level variation, which is unrelated to local image texture. Similar to GLCM, the GLRL matrix is quantized to Ng gray tones to simplify texture extraction and to yield a more robust technique. The row index  $i$  of the GLRL matrix represents the gray tone of value  $i$ . In contrast, the column index  $j$  is the run-length, which is defined as a number of adjacent and equal-value pixels in a given direction. The value of each element in the GLRL matrix represents the number of pixel line segments (run) with run-length  $j$  and gray tone  $i$ . The same directions considered in GLCM were averaged for the GLRL matrix. For additional details on the GRLR features, please see the equations below.

Finally, the GLGM was used to provide the histogram of the absolute gradient values in the ROI. As a preprocessing step, the gradient of each pixel within the ROI was computed by using a  $3 \times 3$  neighborhood. The GLGM features mathematically summarize the gradient values of the pixels in the ROI and include mean, variance, skewness, and kurtosis.

### GLCM Features

We tested the following GLCM features proposed by Haralick et al<sup>1</sup>:

- 1) Contrast = 
$$\sum_{i,j} |i - j|^2 p(i, j)$$
- 2) Correlation = 
$$\sum_{i,j} \frac{(i - \mu_i)(j - \mu_j)p(i, j)}{\sigma_i \sigma_j}$$
- 3) Angular Second Moment = 
$$\sum_{i,j} p(i, j)^2$$

$$4) \quad \text{Homogeneity} = \sum_{i,j} \frac{p(i, j)}{1 + |i - j|}$$

$$5) \quad \text{Entropy} = \sum_{i,j} \ln[p(i, j)]p(i, j),$$

where  $p(i, j)$  represents the  $(i, j)$  value of the GLCM.

### GLRL Features

The features explored included equations using short-run emphasis (SRE), long-run emphasis (LRE), gray-level nonuniformity (GLN), run-length nonuniformity (RLN), run percentage (RP), low gray-level run emphasis (LGRE), high gray-level run emphasis (HGRE), short-run low gray-level emphasis (SRLGE), short-run high gray-level emphasis (SRHGE), long-run low gray-level emphasis (LRLGE), and long-run high gray-level emphasis (LRHGE), defined as follows:

$$6) \quad \text{SRE} = \frac{1}{n_r} \sum_{i,j} \frac{p(i, j)}{j^2}$$

$$7) \quad \text{LRE} = \frac{1}{n_r} \sum_{i,j} p(i, j)j^2$$

$$8) \quad \text{GLN} = \frac{1}{n_r} \sum_i \left[ \sum_j p(i, j) \right]^2$$

$$9) \quad \text{RLN} = \frac{1}{n_r} \sum_j \left[ \sum_i p(i, j) \right]^2$$

$$10) \quad \text{RP} = \frac{n_r}{n_p}$$

$$11) \quad \text{LGRE} = \frac{1}{n_r} \sum_{i,j} \frac{p(i, j)}{i^2}$$

$$12) \quad \text{HGRE} = \frac{1}{n_r} \sum_{i,j} p(i, j)i^2$$

$$13) \quad \text{SRLGE} = \frac{1}{n_r} \sum_{i,j} \frac{p(i, j)}{i^2 j^2}$$

$$14) \quad \text{SRHGE} = \frac{1}{n_r} \sum_{i,j} \frac{p(i, j)i^2}{j^2}$$

$$15) \quad \text{LRLGE} = \frac{1}{n_r} \sum_{i,j} \frac{p(i, j)j^2}{i^2}$$

$$16) \quad \text{LRHGE} = \sum_{i,j} p(i, j)i^2 j^2,$$

where  $p(i, j)$  represents the  $(i, j)$  value of the GLRL matrix,  $n_r$  is the total number of runs, and  $n_p$  is the total number of pixels.

**On-line Table 1: Summary of statistically significant changes in the texture features with variations in CT parameters<sup>a</sup>**

| Texture Parameter            | 16-MDCT vs 64-MDCT                 | mA    | kV    | Section Thickness                                                   | Pitch  | Acquisition Mode (16-MDCT)              | Acquisition Mode (64-MDCT)         |
|------------------------------|------------------------------------|-------|-------|---------------------------------------------------------------------|--------|-----------------------------------------|------------------------------------|
| Histogram ( <i>n</i> = 13)   | 3 (23)                             | 0 (0) | 0 (0) | 9 (69)                                                              | 0 (0)  | 5 (38)                                  | 4 (31)                             |
|                              | Range, 2nd SD, SD5                 |       |       | Median, SD, range, harmonic mean, 2nd SD, SD5, SD9, 4th moment, IQR |        | Range, harmonic mean, 2nd SD, SD5, SD9  | Harmonic mean, 2nd SD, SD5, SD9    |
| GLCM ( <i>n</i> = 5)         | 1 (20)                             | 0 (0) | 0 (0) | 5 (100)                                                             | 0 (0)  | 1 (20)                                  | 0 (0)                              |
|                              | Correlation                        |       |       | Entropy, contrast, correlation, energy, homogeneity                 |        | Homogeneity                             |                                    |
| GLRL ( <i>n</i> = 11)        | 0 (0)                              | 0 (0) | 0 (0) | 7 (64)                                                              | 0 (0)  | 7 (64)                                  | 4 (36)                             |
|                              |                                    |       |       | SRE, LRE, GLN, RLN, SRHGE, LRLGE, LRHGE                             |        | SRE, LRE, GLN, RLN, SRHGE, LRLGE, LRHGE | SRE, LRE, GLN, RLN                 |
| Law features ( <i>n</i> = 9) | 9 (100)                            | 0 (0) | 0 (0) | 9 (100)                                                             | 1 (11) | 9 (100)                                 | 9 (100)                            |
|                              | L1, L2, L3, L4, L5, L6, L7, L8, L9 |       |       | L1, L2, L3, L4, L5, L6, L7, L8, L9                                  |        | L1, L2, L3, L4, L5, L6, L7, L8, L9      | L1, L2, L3, L4, L5, L6, L7, L8, L9 |
| GLGM ( <i>n</i> = 4)         | 0 (0)                              | 0 (0) | 0 (0) | 4 (100)                                                             | 0 (0)  | 0 (0)                                   | 1 (25)                             |
|                              |                                    |       |       | MGR, VGR, skewness, kurtosis                                        |        |                                         | MGR                                |

**Note:**—SD5 indicates 5-neighborhood SD; SD9, 9-neighborhood SD; IQR, interquartile range; SRE, short-run low gray-level emphasis; SRHGE, short-run high gray-level emphasis; SRE, short-run emphasis; LRE, long-run emphasis; GLN, gray-level nonuniformity; RLN, run-length nonuniformity; LRLGE, long-run low gray-level emphasis; LRLGE, long-run high gray-level emphasis; MGR, mean gradients; VGR, variance of gradients.

<sup>a</sup> Data are presented as the number of texture parameters with percentages in parentheses. Statistically significant with the 2-tailed *t* test and false detection analyses (*Q* < 0.05).

**On-line Table 2: Texture parameters by MDCT type**

|                     | 16-Detector Row (n = 7) |          | 64-Detector Row (n = 7) |          | P Value | Q Value |
|---------------------|-------------------------|----------|-------------------------|----------|---------|---------|
|                     | Mean                    | SD       | Mean                    | SD       |         |         |
| <b>Histogram</b>    |                         |          |                         |          |         |         |
| Mean                | 231.25                  | 11.67    | 222.81                  | 17.47    | .309    | 0.447   |
| Median              | 225.71                  | 6.80     | 218.14                  | 11.19    | .152    | 0.319   |
| SD                  | 152.21                  | 23.31    | 147.36                  | 28.07    | .731    | 0.788   |
| Range               | 42.64                   | 1.31     | 46.79                   | 2.87     | .005    | 0.018   |
| Geometric mean      | 206.49                  | 10.56    | 197.38                  | 15.78    | .229    | 0.431   |
| Harmonic mean       | 149.84                  | 5.10     | 141.97                  | 7.88     | .047    | 0.125   |
| 2nd SD              | 14.58                   | 0.44     | 15.99                   | 0.97     | .004    | 0.018   |
| SD5                 | 23.76                   | 0.74     | 25.95                   | 1.56     | .006    | 0.020   |
| SD9                 | 39.99                   | 1.37     | 42.96                   | 2.55     | .019    | 0.056   |
| 4th Moment          | 3.24E+09                | 1.56E+09 | 3.07E+09                | 1.84E+09 | .858    | 0.858   |
| IQR                 | 143.29                  | 11.16    | 144.71                  | 13.82    | .835    | 0.856   |
| Entropy             | 7.05                    | 0.08     | 7.00                    | 0.11     | .356    | 0.483   |
| Test                | 0.72                    | 0.33     | 0.52                    | 0.35     | .287    | 0.431   |
| <b>GLCM</b>         |                         |          |                         |          |         |         |
| Entropy             | 1.14                    | 0.10     | 1.20                    | 0.10     | .278    | 0.431   |
| Contrast            | 1.96                    | 0.19     | 2.23                    | 0.26     | .048    | 0.125   |
| Correlation         | 0.98                    | 0.002    | 0.98                    | 0.003    | .012    | 0.039   |
| Energy              | 0.02                    | 0.002    | 0.02                    | 0.002    | .475    | 0.569   |
| Homogeneity         | 0.70                    | 0.02     | 0.68                    | 0.01     | .057    | 0.141   |
| <b>GLRL</b>         |                         |          |                         |          |         |         |
| SRE                 | 0.06                    | 0.01     | 0.07                    | 0.01     | .393    | 0.506   |
| LRE                 | 0.06                    | 0.01     | 0.07                    | 0.01     | .424    | 0.524   |
| GLN                 | 0.06                    | 0.005    | 0.06                    | 0.01     | .277    | 0.431   |
| RLN                 | 0.06                    | 0.01     | 0.07                    | 0.01     | .398    | 0.506   |
| RP                  | 90.03                   | 8.46     | 84.18                   | 12.48    | .325    | 0.454   |
| LGRE                | 88.22                   | 8.89     | 81.69                   | 11.73    | .263    | 0.431   |
| HGRE                | 92.90                   | 9.17     | 85.38                   | 11.68    | .205    | 0.411   |
| SRLGE               | 88.31                   | 7.95     | 82.02                   | 11.74    | .263    | 0.431   |
| SRHGE               | 1.35E+04                | 1.22E+03 | 1.53E+04                | 2.36E+03 | .099    | 0.222   |
| LRLGE               | 2.37E+04                | 1.76E+03 | 2.57E+04                | 3.88E+03 | .249    | 0.431   |
| LRHGE               | 1.32E+04                | 926.28   | 1.48E+04                | 2.19E+03 | .100    | 0.222   |
| <b>Law features</b> |                         |          |                         |          |         |         |
| L1                  | 2.31E+05                | 5.91E+03 | 2.66E+05                | 1.41E+04 | <.0001  | 0.001   |
| L2                  | 1.56E+04                | 312.58   | 2.08E+04                | 777.47   | <.0001  | 0.001   |
| L3                  | 6.57E+03                | 187.63   | 8.70E+03                | 371.65   | <.0001  | 0.001   |
| L4                  | 5.26E+04                | 1.16E+03 | 6.45E+04                | 2.84E+03 | <.0001  | 0.001   |
| L5                  | 2.55E+03                | 67.97    | 3.40E+03                | 115.48   | <.0001  | 0.001   |
| L6                  | 1.23E+03                | 6.85     | 1.38E+03                | 19.14    | <.0001  | 0.001   |
| L7                  | 1.57E+03                | 46.55    | 2.21E+03                | 87.39    | <.0001  | 0.001   |
| L8                  | 4.19E+03                | 42.91    | 4.34E+03                | 79.31    | .001    | 0.006   |
| L9                  | 2.88E+04                | 783.34   | 3.56E+04                | 1.67E+03 | <.0001  | 0.001   |
| <b>GLGM</b>         |                         |          |                         |          |         |         |
| MGR                 | 25.35                   | 3.42     | 25.79                   | 1.83     | .768    | 0.806   |
| VGR                 | 7.93E+03                | 2.10E+03 | 8.50E+03                | 1.85E+03 | .596    | 0.695   |
| Skewness            | 9.26                    | 2.41     | 8.69                    | 2.04     | 0.643   | 0.710   |
| Kurtosis            | 178.94                  | 84.50    | 158.00                  | 66.21    | 0.615   | 0.698   |

**Note:**—SD5 indicates 5-neighborhood SD; SD9, 9-neighborhood SD; IQR, interquartile range; HGRE, high gray-level run emphasis; LGRE, low gray-level run emphasis; SRLGE, short-run low gray-level emphasis; SRHGE, short-run high gray-level emphasis; SRE, short-run emphasis; LRE, long-run emphasis; GLN, gray-level nonuniformity; RLN, run-length nonuniformity; LRLGE, long-run low gray-level emphasis; LRHGE, long-run high gray-level emphasis; MGR, mean gradients; VGR, variance of gradients.

**On-line Table 3: Texture parameters by scan milliampere**

|                     | 80 (n = 7) |          | 100 (n = 7) |          | 120 (n = 7) |          | 140 (n = 7) |          | P Value | Q Value |
|---------------------|------------|----------|-------------|----------|-------------|----------|-------------|----------|---------|---------|
|                     | Mean       | SD       | Mean        | SD       | Mean        | SD       | Mean        | SD       |         |         |
| <b>Histogram</b>    |            |          |             |          |             |          |             |          |         |         |
| Mean                | 222.54     | 13.93    | 224.31      | 16.88    | 224.97      | 16.55    | 222.81      | 17.47    | .990    | 1.000   |
| Median              | 218.71     | 9.53     | 219.57      | 11.31    | 221.00      | 11.80    | 218.14      | 11.19    | .965    | 1.000   |
| SD                  | 147.00     | 25.42    | 150.56      | 27.58    | 147.26      | 24.08    | 147.36      | 28.07    | .993    | 1.000   |
| Range               | 46.40      | 1.72     | 46.86       | 2.28     | 46.86       | 2.10     | 46.79       | 2.87     | .978    | 1.000   |
| Geometric mean      | 197.84     | 13.74    | 199.98      | 15.89    | 201.06      | 17.05    | 197.38      | 15.78    | .966    | 1.000   |
| Harmonic mean       | 143.31     | 8.77     | 145.45      | 9.39     | 147.56      | 12.73    | 141.97      | 7.88     | .732    | 1.000   |
| 2nd SD              | 15.86      | 0.59     | 16.02       | 0.77     | 16.02       | 0.72     | 15.99       | 0.97     | .976    | 1.000   |
| SD5                 | 25.73      | 0.94     | 25.98       | 1.25     | 25.98       | 1.13     | 25.95       | 1.56     | .977    | 1.000   |
| SD9                 | 42.62      | 1.48     | 43.02       | 2.06     | 43.03       | 1.78     | 42.96       | 2.55     | .977    | 1.000   |
| 4th Moment          | 3.15E+09   | 1.83E+09 | 3.40E+09    | 2.01E+09 | 3.07E+09    | 1.65E+09 | 3.07E+09    | 1.84E+09 | .984    | 1.000   |
| IQR                 | 143.00     | 10.80    | 144.29      | 14.16    | 143.29      | 10.80    | 144.71      | 13.82    | .993    | 1.000   |
| Entropy             | 6.99       | 0.09     | 6.98        | 0.12     | 6.99        | 0.11     | 7.00        | 0.11     | .982    | 1.000   |
| Test                | 0.52       | 0.33     | 0.52        | 0.19     | 0.53        | 0.30     | 0.52        | 0.35     | 1.000   | 1.000   |
| <b>GLCM</b>         |            |          |             |          |             |          |             |          |         |         |
| Entropy             | 1.19       | 0.08     | 1.16        | 0.09     | 1.19        | 0.09     | 1.20        | 0.10     | .865    | 1.000   |
| Contrast            | 2.16       | 0.16     | 2.16        | 0.28     | 2.18        | 0.27     | 2.23        | 0.26     | .941    | 1.000   |
| Correlation         | 0.98       | 0.003    | 0.98        | 0.003    | 0.98        | 0.003    | 0.98        | 0.003    | .990    | 1.000   |
| Energy              | 0.02       | 0.002    | 0.02        | 0.002    | 0.02        | 0.001    | 0.02        | 0.002    | .913    | 1.000   |
| Homogeneity         | 0.68       | 0.01     | 0.69        | 0.01     | 0.68        | 0.01     | 0.68        | 0.01     | .915    | 1.000   |
| <b>GLRL</b>         |            |          |             |          |             |          |             |          |         |         |
| SRE                 | 0.06       | 0.004    | 0.07        | 0.01     | 0.06        | 0.01     | 0.07        | 0.01     | .756    | 1.000   |
| LRE                 | 0.07       | 0.004    | 0.07        | 0.005    | 0.07        | 0.01     | 0.07        | 0.01     | .813    | 1.000   |
| GLN                 | 0.06       | 0.003    | 0.07        | 0.005    | 0.06        | 0.01     | 0.06        | 0.01     | .861    | 1.000   |
| RLN                 | 0.07       | 0.004    | 0.07        | 0.005    | 0.07        | 0.01     | 0.07        | 0.01     | .801    | 1.000   |
| RP                  | 83.07      | 8.39     | 81.97       | 13.32    | 83.62       | 13.04    | 84.18       | 12.48    | .988    | 1.000   |
| LGRE                | 80.79      | 8.17     | 79.50       | 12.90    | 81.29       | 12.47    | 81.69       | 11.73    | .986    | 1.000   |
| HGRE                | 84.34      | 8.11     | 83.41       | 13.27    | 85.03       | 12.64    | 85.38       | 11.68    | .989    | 1.000   |
| SRLGE               | 81.06      | 8.34     | 80.14       | 12.98    | 81.48       | 12.41    | 82.02       | 11.74    | .992    | 1.000   |
| SRHGE               | 1.53E+04   | 2.24E+03 | 1.45E+04    | 1.14E+03 | 1.47E+04    | 2.17E+03 | 1.53E+04    | 2.36E+03 | .830    | 1.000   |
| LRLGE               | 2.58E+04   | 3.58E+03 | 2.43E+04    | 1.47E+03 | 2.50E+04    | 3.33E+03 | 2.57E+04    | 3.88E+03 | .806    | 1.000   |
| LRHGE               | 1.48E+04   | 2.31E+03 | 1.37E+04    | 850.82   | 1.43E+04    | 1.87E+03 | 1.48E+04    | 2.19E+03 | .656    | 1.000   |
| <b>Law features</b> |            |          |             |          |             |          |             |          |         |         |
| L1                  | 2.64E+05   | 8.61E+03 | 2.66E+05    | 1.16E+04 | 2.67E+05    | 1.00E+04 | 2.66E+05    | 1.41E+04 | .961    | 1.000   |
| L2                  | 2.08E+04   | 596.58   | 2.09E+04    | 638.95   | 21018.64    | 698.86   | 2.08E+04    | 777.47   | .948    | 1.000   |
| L3                  | 8.69E+03   | 234.37   | 8.73E+03    | 305.55   | 8.76E+03    | 268.35   | 8.70E+03    | 371.65   | .965    | 1.000   |
| L4                  | 6.41E+04   | 1.84E+03 | 6.46E+04    | 2.32E+03 | 6.49E+04    | 2.18E+03 | 6.45E+04    | 2.84E+03 | .948    | 1.000   |
| L5                  | 3.40E+03   | 85.01    | 3.42E+03    | 70.44    | 3.41E+03    | 113.02   | 3.40E+03    | 115.48   | .982    | 1.000   |
| L6                  | 1.39E+03   | 15.78    | 1.39E+03    | 14.86    | 1.39E+03    | 15.55    | 1.38E+03    | 19.14    | .974    | 1.000   |
| L7                  | 2.21E+03   | 59.10    | 2.22E+03    | 66.95    | 2.23E+03    | 62.60    | 2.21E+03    | 87.39    | .966    | 1.000   |
| L8                  | 4.32E+03   | 32.91    | 4.34E+03    | 88.68    | 4.31E+03    | 40.53    | 4.34E+03    | 79.31    | .843    | 1.000   |
| L9                  | 3.55E+04   | 1.03E+03 | 3.57E+04    | 1.42E+03 | 3.58E+04    | 1.18E+03 | 3.56E+04    | 1.67E+03 | .969    | 1.000   |
| <b>GLGM</b>         |            |          |             |          |             |          |             |          |         |         |
| MGR                 | 26.03      | 1.59     | 25.69       | 2.60     | 25.38       | 1.16     | 25.79       | 1.83     | .932    | 1.000   |
| VGR                 | 8.43E+03   | 1.73E+03 | 8.61E+03    | 1.93E+03 | 8.27E+03    | 1.44E+03 | 8.50E+03    | 1.85E+03 | .987    | 1.000   |
| Skewness            | 8.56       | 2.22     | 9.10        | 1.69     | 8.91        | 2.11     | 8.69        | 2.04     | .961    | 1.000   |
| Kurtosis            | 154.33     | 71.44    | 171.57      | 55.45    | 169.64      | 69.26    | 158.00      | 66.21    | .949    | 1.000   |

**Note:**—SD5 indicates 5-neighborhood SD; SD9, 9-neighborhood SD; IQR, interquartile range; HGRE, high gray-level run emphasis; LGRE, low gray-level run emphasis; SRLGE, short-run low gray-level emphasis; SRHGE, short-run high gray-level emphasis; SRE, short-run emphasis; LRE, long-run emphasis; GLN, gray-level nonuniformity; RLN, run-length nonuniformity; LRLGE, long-run low gray-level emphasis; LRHGE, long-run high gray-level emphasis; MGR, mean gradients; VGR, variance of gradients.

**On-line Table 4: Texture parameters by scan kilovolt**

|                     | 80 (n = 7) |          | 100 (n = 7) |          | 120 (n = 7) |          | 140 (n = 7) |          | P Value | Q Value |
|---------------------|------------|----------|-------------|----------|-------------|----------|-------------|----------|---------|---------|
|                     | Mean       | SD       | Mean        | SD       | Mean        | SD       | Mean        | SD       |         |         |
| <b>Histogram</b>    |            |          |             |          |             |          |             |          |         |         |
| Mean                | 223.34     | 12.98    | 224.21      | 15.36    | 222.81      | 17.47    | 226.70      | 15.00    | .965    | 0.998   |
| Median              | 219.86     | 8.28     | 219.86      | 10.84    | 218.14      | 11.19    | 220.86      | 7.93     | .962    | 0.998   |
| SD                  | 144.44     | 24.97    | 149.30      | 25.69    | 147.36      | 28.07    | 152.49      | 33.53    | .959    | 0.998   |
| Range               | 46.81      | 2.04     | 46.90       | 2.25     | 46.79       | 2.87     | 46.64       | 2.21     | .998    | 0.998   |
| Geometric mean      | 198.18     | 11.80    | 199.30      | 14.73    | 197.38      | 15.78    | 201.32      | 12.23    | .954    | 0.998   |
| Harmonic mean       | 144.19     | 5.61     | 144.03      | 8.99     | 141.97      | 7.88     | 145.60      | 3.55     | .801    | 0.998   |
| 2nd SD              | 16.01      | 0.69     | 16.04       | 0.77     | 15.99       | 0.97     | 15.95       | 0.74     | .997    | 0.998   |
| SD5                 | 25.94      | 1.10     | 26.03       | 1.24     | 25.95       | 1.56     | 25.86       | 1.20     | .996    | 0.998   |
| SD9                 | 42.87      | 1.80     | 43.12       | 2.03     | 42.96       | 2.55     | 42.81       | 2.01     | .993    | 0.998   |
| 4th Moment          | 2.74E+09   | 1.60E+09 | 3.24E+09    | 1.79E+09 | 3.07E+09    | 1.84E+09 | 3.64E+09    | 2.47E+09 | .856    | 0.998   |
| IQR                 | 142.86     | 12.02    | 144.57      | 11.36    | 144.71      | 13.82    | 145.29      | 16.93    | .989    | 0.998   |
| Entropy             | 7.02       | 0.07     | 7.03        | 0.06     | 7.00        | 0.11     | 7.03        | 0.09     | .965    | 0.998   |
| Test                | 0.50       | 0.32     | 0.50        | 0.25     | 0.52        | 0.35     | 0.53        | 0.38     | .962    | 0.998   |
| <b>GLCM</b>         |            |          |             |          |             |          |             |          |         |         |
| Entropy             | 1.23       | 0.05     | 1.23        | 0.07     | 1.20        | 0.10     | 1.22        | 0.05     | .894    | 0.998   |
| Contrast            | 2.22       | 0.19     | 2.20        | 0.14     | 2.23        | 0.26     | 2.26        | 0.15     | .996    | 0.998   |
| Correlation         | 0.98       | 0.003    | 0.98        | 0.003    | 0.98        | 0.003    | 0.98        | 0.004    | .882    | 0.998   |
| Energy              | 0.01       | 0.001    | 0.01        | 0.001    | 0.02        | 0.002    | 0.01        | 0.001    | .941    | 0.998   |
| Homogeneity         | 0.68       | 0.01     | 0.68        | 0.01     | 0.68        | 0.01     | 0.68        | 0.01     | .857    | 0.998   |
| <b>GLRL</b>         |            |          |             |          |             |          |             |          |         |         |
| SRE                 | 0.06       | 0.01     | 0.06        | 0.005    | 0.07        | 0.01     | 0.06        | 0.01     | .838    | 0.998   |
| LRE                 | 0.07       | 0.01     | 0.06        | 0.004    | 0.07        | 0.01     | 0.06        | 0.01     | .913    | 0.998   |
| GLN                 | 0.06       | 0.004    | 0.06        | 0.003    | 0.06        | 0.01     | 0.06        | 0.005    | .703    | 0.998   |
| RLN                 | 0.07       | 0.01     | 0.06        | 0.004    | 0.07        | 0.01     | 0.06        | 0.01     | .812    | 0.998   |
| RP                  | 84.96      | 7.74     | 86.18       | 7.58     | 84.18       | 12.48    | 88.48       | 9.99     | .589    | 0.998   |
| LGRE                | 82.69      | 7.39     | 84.16       | 6.97     | 81.69       | 11.73    | 85.86       | 9.25     | .791    | 0.998   |
| HGRE                | 86.08      | 7.45     | 87.64       | 6.88     | 85.38       | 11.68    | 89.70       | 9.21     | .850    | 0.998   |
| SRLGE               | 82.80      | 7.14     | 84.04       | 6.89     | 82.02       | 11.74    | 86.43       | 9.37     | .837    | 0.998   |
| SRHGE               | 1.51E+04   | 1.62E+03 | 1.65E+04    | 1.49E+03 | 1.53E+04    | 2.36E+03 | 1.52E+04    | 2.26E+03 | .814    | 0.998   |
| LRLGE               | 2.55E+04   | 2.55E+03 | 2.78E+04    | 2.31E+03 | 2.57E+04    | 3.88E+03 | 2.56E+04    | 3.82E+03 | .809    | 0.998   |
| LRHGE               | 1.46E+04   | 1.68E+03 | 1.60E+04    | 1.56E+03 | 1.48E+04    | 2.19E+03 | 1.46E+04    | 2.23E+03 | .480    | 0.998   |
| <b>Law features</b> |            |          |             |          |             |          |             |          |         |         |
| L1                  | 2.67E+05   | 8.74E+03 | 2.67E+05    | 1.11E+04 | 2.66E+05    | 1.41E+04 | 2.65E+05    | 9.79E+03 | .971    | 0.998   |
| L2                  | 2.14E+04   | 653.29   | 2.10E+04    | 676.37   | 2.08E+04    | 777.47   | 2.07E+04    | 597.36   | .255    | 0.998   |
| L3                  | 8.88E+03   | 256.38   | 8.76E+03    | 262.31   | 8.70E+03    | 371.65   | 8.65E+03    | 302.06   | .518    | 0.998   |
| L4                  | 6.55E+04   | 1.85E+03 | 6.50E+04    | 2.30E+03 | 6.45E+04    | 2.84E+03 | 6.42E+04    | 1.92E+03 | .736    | 0.998   |
| L5                  | 3.51E+03   | 76.18    | 3.41E+03    | 83.34    | 3.40E+03    | 115.48   | 3.37E+03    | 114.36   | .094    | 0.998   |
| L6                  | 1.40E+03   | 18.71    | 1.39E+03    | 14.56    | 1.38E+03    | 19.14    | 1.38E+03    | 17.62    | .089    | 0.998   |
| L7                  | 2.27E+03   | 65.23    | 2.23E+03    | 59.88    | 2.21E+03    | 87.39    | 2.20E+03    | 81.52    | .256    | 0.998   |
| L8                  | 4.34E+03   | 38.92    | 4.33E+03    | 51.70    | 4.34E+03    | 79.31    | 4.33E+03    | 56.59    | .984    | 0.998   |
| L9                  | 3.60E+04   | 1.09E+03 | 3.58E+04    | 1.22E+03 | 3.56E+04    | 1.67E+03 | 3.54E+04    | 1.25E+03 | .855    | 0.998   |
| <b>GLGM</b>         |            |          |             |          |             |          |             |          |         |         |
| MGR                 | 24.65      | 1.77     | 27.48       | 2.63     | 25.79       | 1.83     | 25.28       | 1.25     | .065    | 0.998   |
| VGR                 | 7.89E+03   | 1.87E+03 | 8.82E+03    | 2.01E+03 | 8.50E+03    | 1.85E+03 | 8.36E+03    | 1.73E+03 | .825    | 0.998   |
| Skewness            | 8.31       | 2.11     | 8.32        | 2.09     | 8.69        | 2.04     | 8.87        | 2.48     | .952    | 0.998   |
| Kurtosis            | 143.77     | 67.47    | 149.01      | 69.82    | 158.00      | 66.21    | 164.57      | 82.53    | .950    | 0.998   |

**Note:**—SD5 indicates 5-neighborhood SD; SD9, 9-neighborhood SD; IQR, interquartile range; HGRE, high gray-level run emphasis; LGRE, low gray-level run emphasis; SRLGE, short-run low gray-level emphasis; SRHGE, short-run high gray-level emphasis; SRE, short-run emphasis; LRE, long-run emphasis; GLN, gray-level nonuniformity; RLN, run-length nonuniformity; LRLGE, long-run low gray-level emphasis; LRHGE, long-run high gray-level emphasis; MGR, mean gradients; VGR, variance of gradients.

**On-line Table 5: Texture parameters by section thickness**

|                     | 0.625 (n = 7) |          | 1.25 (n = 7) |          | 2.5 (n = 7) |          | 5 (n = 7) |          | P Value | Q Value |
|---------------------|---------------|----------|--------------|----------|-------------|----------|-----------|----------|---------|---------|
|                     | Mean          | SD       | Mean         | SD       | Mean        | SD       | Mean      | SD       |         |         |
| <b>Histogram</b>    |               |          |              |          |             |          |           |          |         |         |
| Mean                | 226.18        | 3.86     | 224.19       | 5.05     | 220.76      | 15.07    | 222.81    | 17.47    | .857    | 0.857   |
| Median              | 236.29        | 2.43     | 235.86       | 2.97     | 228.43      | 9.32     | 218.14    | 11.19    | .0004   | 0.001   |
| SD                  | 193.20        | 5.60     | 189.53       | 11.45    | 164.39      | 25.18    | 147.36    | 28.07    | .001    | 0.001   |
| Range               | 81.05         | 0.77     | 74.91        | 2.16     | 60.35       | 2.48     | 46.79     | 2.87     | <.0001  | 0.0002  |
| Geometric mean      | 171.93        | 4.28     | 174.93       | 5.68     | 182.13      | 14.29    | 197.38    | 15.78    | .001    | 0.002   |
| Harmonic mean       | 90.46         | 4.23     | 99.54        | 5.01     | 116.02      | 8.96     | 141.97    | 7.88     | <.0001  | 0.0002  |
| 2nd SD              | 27.81         | 0.26     | 25.68        | 0.75     | 20.67       | 0.85     | 15.99     | 0.97     | <.0001  | 0.0002  |
| SD5                 | 45.27         | 0.42     | 41.87        | 1.17     | 33.68       | 1.32     | 25.95     | 1.56     | <.0001  | 0.0002  |
| SD9                 | 74.10         | 0.72     | 68.96        | 1.63     | 55.88       | 1.95     | 42.96     | 2.55     | <.0001  | 0.0002  |
| 4th Moment          | 6.79E+09      | 7.49E+08 | 6.73E+09     | 1.67E+09 | 4.37E+09    | 2.37E+09 | 3.07E+09  | 1.84E+09 | .001    | 0.001   |
| IQR                 | 225.86        | 9.30     | 220.14       | 12.82    | 180.14      | 10.51    | 144.71    | 13.82    | <.0001  | 0.0002  |
| Entropy             | 7.07          | 0.02     | 7.02         | 0.03     | 7.01        | 0.09     | 7.00      | 0.11     | .257    | 0.277   |
| Test                | 0.38          | 0.29     | 0.44         | 0.31     | 0.57        | 0.39     | 0.52      | 0.35     | .738    | 0.756   |
| <b>GLCM</b>         |               |          |              |          |             |          |           |          |         |         |
| Entropy             | 1.21          | 0.02     | 1.08         | 0.06     | 1.13        | 0.06     | 1.20      | 0.10     | .003    | 0.003   |
| Contrast            | 4.61          | 0.16     | 4.07         | 0.10     | 2.99        | 0.17     | 2.23      | 0.26     | <.0001  | 0.0002  |
| Correlation         | 0.97          | 0.001    | 0.97         | 0.002    | 0.98        | 0.004    | 0.98      | 0.003    | .0002   | 0.0003  |
| Energy              | 0.02          | 0.001    | 0.02         | 0.002    | 0.02        | 0.001    | 0.02      | 0.002    | <.0001  | 0.0002  |
| Homogeneity         | 0.59          | 0.002    | 0.61         | 0.01     | 0.64        | 0.01     | 0.68      | 0.01     | <.0001  | 0.0002  |
| <b>GLRL</b>         |               |          |              |          |             |          |           |          |         |         |
| SRE                 | 0.09          | 0.003    | 0.09         | 0.01     | 0.08        | 0.004    | 0.07      | 0.01     | <.0001  | 0.0002  |
| LRE                 | 0.10          | 0.003    | 0.09         | 0.01     | 0.08        | 0.004    | 0.07      | 0.01     | <.0001  | 0.0002  |
| GLN                 | 0.09          | 0.003    | 0.09         | 0.005    | 0.08        | 0.003    | 0.06      | 0.01     | <.0001  | 0.0002  |
| RLN                 | 0.10          | 0.003    | 0.09         | 0.01     | 0.08        | 0.004    | 0.07      | 0.01     | <.0001  | 0.0002  |
| RP                  | 92.17         | 2.58     | 89.16        | 3.79     | 84.19       | 9.66     | 84.18     | 12.48    | .214    | 0.236   |
| LGRE                | 89.55         | 2.44     | 86.81        | 3.46     | 81.80       | 9.23     | 81.69     | 11.73    | .183    | 0.208   |
| HGRE                | 91.91         | 2.51     | 89.73        | 3.68     | 85.78       | 9.50     | 85.38     | 11.68    | .357    | 0.374   |
| SRLGE               | 90.50         | 2.71     | 87.76        | 3.65     | 82.33       | 9.71     | 82.02     | 11.74    | .152    | 0.178   |
| SRHGE               | 3.47E+04      | 2.24E+03 | 3.18E+04     | 1.28E+03 | 2.23E+04    | 1.32E+03 | 1.53E+04  | 2.36E+03 | <.0001  | 0.0002  |
| LRLGE               | 4.84E+04      | 2.47E+03 | 4.46E+04     | 2.25E+03 | 3.40E+04    | 2.35E+03 | 2.57E+04  | 3.88E+03 | <.0001  | 0.0002  |
| LRHGE               | 3.46E+04      | 1.71E+03 | 3.14E+04     | 1.50E+03 | 2.17E+04    | 1.60E+03 | 1.48E+04  | 2.19E+03 | <.0001  | 0.0002  |
| <b>Law features</b> |               |          |              |          |             |          |           |          |         |         |
| L1                  | 5.11E+05      | 5.80E+03 | 4.64E+05     | 1.80E+04 | 3.62E+05    | 1.38E+04 | 2.66E+05  | 1.41E+04 | <.0001  | 0.0002  |
| L2                  | 4.30E+04      | 468.96   | 3.77E+04     | 1.82E+03 | 2.84E+04    | 1.12E+03 | 2.08E+04  | 777.47   | <.0001  | 0.0002  |
| L3                  | 1.82E+04      | 290.69   | 1.60E+04     | 767.33   | 1.19E+04    | 474.85   | 8.70E+03  | 371.65   | <.0001  | 0.0002  |
| L4                  | 1.29E+05      | 1.61E+03 | 1.16E+05     | 5.03E+03 | 8.83E+04    | 3.47E+03 | 6.45E+04  | 2.84E+03 | <.0001  | 0.0002  |
| L5                  | 6.68E+03      | 102.17   | 5.92E+03     | 229.47   | 4.49E+03    | 150.24   | 3.40E+03  | 115.48   | <.0001  | 0.0002  |
| L6                  | 2.13E+03      | 23.38    | 1.93E+03     | 66.70    | 1.61E+03    | 37.98    | 1.38E+03  | 19.14    | <.0001  | 0.0002  |
| L7                  | 4.67E+03      | 75.08    | 4.08E+03     | 201.21   | 3.02E+03    | 121.06   | 2.21E+03  | 87.39    | <.0001  | 0.0002  |
| L8                  | 5.60E+03      | 39.94    | 5.34E+03     | 127.68   | 4.78E+03    | 78.19    | 4.34E+03  | 79.31    | <.0001  | 0.0002  |
| L9                  | 7.17E+04      | 1.06E+03 | 6.43E+04     | 2.89E+03 | 4.85E+04    | 1.83E+03 | 3.56E+04  | 1.67E+03 | <.0001  | 0.0002  |
| <b>GLGM</b>         |               |          |              |          |             |          |           |          |         |         |
| MGR                 | 44.51         | 2.63     | 41.88        | 2.55     | 31.67       | 2.08     | 25.79     | 1.83     | <.0001  | 0.0002  |
| VGR                 | 2.07E+04      | 1.03E+03 | 1.89E+04     | 1.71E+03 | 1.20E+04    | 1.96E+03 | 8.50E+03  | 1.85E+03 | <.0001  | 0.0002  |
| Skewness            | 5.26          | 0.30     | 5.85         | 0.57     | 6.61        | 1.39     | 8.69      | 2.04     | .0002   | 0.0003  |
| Kurtosis            | 51.76         | 6.14     | 67.12        | 15.30    | 89.31       | 41.61    | 158.00    | 66.21    | .0002   | 0.0003  |

**Note:**—SD5 indicates 5-neighborhood SD; SD9, 9-neighborhood SD; IQR, interquartile range; HGRE, high gray-level run emphasis; LGRE, low gray-level run emphasis; SRLGE, short-run low gray-level emphasis; SRHGE, short-run high gray-level emphasis; SRE, short-run emphasis; LRE, long-run emphasis; GLN, gray-level nonuniformity; RLN, run-length nonuniformity; LRLGE, long-run low gray-level emphasis; LRHGE, long-run high gray-level emphasis; MGR, mean gradients; VGR, variance of gradients.

**On-line Table 6: Texture parameters by pitch**

|                     | 0.51 (n = 7) |          | 0.98 (n = 7) |          | 1.37 (n = 7) |          | 1.75 (n = 7) |          | P Value | Q Value |
|---------------------|--------------|----------|--------------|----------|--------------|----------|--------------|----------|---------|---------|
|                     | Mean         | SD       | Mean         | SD       | Mean         | SD       | Mean         | SD       |         |         |
| <b>Histogram</b>    |              |          |              |          |              |          |              |          |         |         |
| Mean                | 222.19       | 15.36    | 222.81       | 17.47    | 221.15       | 15.16    | 223.34       | 14.11    | .994    | 0.999   |
| Median              | 218.29       | 10.48    | 218.14       | 11.19    | 218.00       | 10.15    | 219.57       | 8.46     | .991    | 0.999   |
| SD                  | 147.30       | 25.93    | 147.36       | 28.07    | 143.03       | 26.58    | 148.55       | 29.04    | .983    | 0.999   |
| Range               | 45.99        | 2.00     | 46.79        | 2.87     | 46.21        | 1.96     | 46.97        | 1.70     | .809    | 0.999   |
| Geometric mean      | 197.57       | 14.62    | 197.38       | 15.78    | 196.77       | 15.29    | 197.84       | 12.80    | .999    | 0.999   |
| Harmonic mean       | 143.11       | 8.55     | 141.97       | 7.88     | 143.31       | 10.17    | 141.71       | 6.08     | .978    | 0.999   |
| 2nd SD              | 15.73        | 0.68     | 15.99        | 0.97     | 15.80        | 0.67     | 16.07        | 0.58     | .805    | 0.999   |
| SD5                 | 25.55        | 1.09     | 25.95        | 1.56     | 25.64        | 1.07     | 26.07        | 0.93     | .819    | 0.999   |
| SD9                 | 42.40        | 1.81     | 42.96        | 2.55     | 42.48        | 1.74     | 43.22        | 1.54     | .836    | 0.999   |
| 4th Moment          | 3.14E+09     | 1.82E+09 | 3.07E+09     | 1.84E+09 | 2.90E+09     | 1.98E+09 | 3.29E+09     | 2.25E+09 | .986    | 0.999   |
| IQR                 | 143.29       | 11.70    | 144.71       | 13.82    | 140.71       | 12.07    | 144.29       | 13.89    | .938    | 0.999   |
| Entropy             | 6.99         | 0.09     | 7.00         | 0.11     | 6.98         | 0.06     | 7.03         | 0.06     | .782    | 0.999   |
| Test                | 0.28         | 0.28     | 0.52         | 0.35     | 0.58         | 0.22     | 0.45         | 0.26     | .257    | 0.999   |
| <b>GLCM</b>         |              |          |              |          |              |          |              |          |         |         |
| Entropy             | 1.18         | 0.07     | 1.20         | 0.10     | 1.20         | 0.08     | 1.23         | 0.06     | .661    | 0.999   |
| Contrast            | 2.10         | 0.20     | 2.23         | 0.26     | 2.14         | 0.16     | 2.22         | 0.14     | .562    | 0.999   |
| Correlation         | 0.98         | 0.003    | 0.98         | 0.003    | 0.98         | 0.003    | 0.98         | 0.003    | .849    | 0.999   |
| Energy              | 0.02         | 0.002    | 0.02         | 0.002    | 0.02         | 0.002    | 0.01         | 0.001    | .767    | 0.999   |
| Homogeneity         | 0.69         | 0.01     | 0.68         | 0.01     | 0.68         | 0.02     | 0.68         | 0.02     | .704    | 0.999   |
| <b>GLRL</b>         |              |          |              |          |              |          |              |          |         |         |
| SRE                 | 0.06         | 0.004    | 0.07         | 0.01     | 0.06         | 0.01     | 0.06         | 0.005    | .895    | 0.999   |
| LRE                 | 0.07         | 0.003    | 0.07         | 0.01     | 0.07         | 0.01     | 0.07         | 0.004    | .943    | 0.999   |
| GLN                 | 0.06         | 0.003    | 0.06         | 0.01     | 0.06         | 0.004    | 0.06         | 0.002    | .885    | 0.999   |
| RLN                 | 0.07         | 0.004    | 0.07         | 0.01     | 0.07         | 0.005    | 0.07         | 0.004    | .919    | 0.999   |
| RP                  | 82.89        | 9.45     | 84.18        | 12.48    | 82.49        | 7.37     | 86.35        | 6.67     | .863    | 0.999   |
| LGRE                | 80.64        | 9.08     | 81.69        | 11.73    | 80.40        | 7.32     | 83.80        | 6.86     | .889    | 0.999   |
| HGRE                | 84.42        | 9.27     | 85.38        | 11.68    | 84.11        | 7.73     | 87.79        | 7.00     | .872    | 0.999   |
| SRLGE               | 81.13        | 9.20     | 82.02        | 11.74    | 80.62        | 6.80     | 84.31        | 6.46     | .867    | 0.999   |
| SRHGE               | 1.60E+04     | 1.78E+03 | 1.53E+04     | 2.36E+03 | 1.63E+04     | 1.94E+03 | 1.59E+04     | 1.98E+03 | .812    | 0.999   |
| LRLGE               | 2.69E+04     | 2.82E+03 | 2.57E+04     | 3.88E+03 | 2.75E+04     | 3.55E+03 | 2.65E+04     | 3.30E+03 | .787    | 0.999   |
| LRHGE               | 1.53E+04     | 1.77E+03 | 1.48E+04     | 2.19E+03 | 1.58E+04     | 2.04E+03 | 1.54E+04     | 1.80E+03 | .807    | 0.999   |
| <b>Law features</b> |              |          |              |          |              |          |              |          |         |         |
| L1                  | 2.62E+05     | 10059.92 | 2.66E+05     | 1.41E+04 | 2.64E+05     | 1.04E+04 | 2.69E+05     | 9.57E+03 | .659    | 0.999   |
| L2                  | 2.04E+04     | 561.29   | 2.08E+04     | 777.47   | 2.09E+04     | 669.74   | 2.14E+04     | 687.56   | .084    | 0.885   |
| L3                  | 8.51E+03     | 244.15   | 8.70E+03     | 371.65   | 8.70E+03     | 262.35   | 8.89E+03     | 236.92   | .122    | 0.999   |
| L4                  | 6.35E+04     | 2.05E+03 | 6.45E+04     | 2.84E+03 | 6.43E+04     | 2.26E+03 | 6.57E+04     | 2.16E+03 | .403    | 0.999   |
| L5                  | 3.30E+03     | 74.56    | 3.40E+03     | 115.48   | 3.40E+03     | 99.87    | 3.47E+03     | 75.56    | .021    | 0.287   |
| L6                  | 1.36E+03     | 12.78    | 1.38E+03     | 19.14    | 1.38E+03     | 12.08    | 1.40E+03     | 12.94    | .001    | 0.034   |
| L7                  | 2.14E+03     | 55.46    | 2.21E+03     | 87.39    | 2.21E+03     | 59.43    | 2.27E+03     | 52.65    | .014    | 0.287   |
| L8                  | 4.31E+03     | 66.54    | 4.34E+03     | 79.31    | 4.29E+03     | 47.24    | 4.33E+03     | 54.47    | .530    | 0.999   |
| L9                  | 3.50E+04     | 1.16E+03 | 3.56E+04     | 1.67E+03 | 3.55E+04     | 1.22E+03 | 3.62E+04     | 1.10E+03 | .402    | 0.999   |
| <b>GLGM</b>         |              |          |              |          |              |          |              |          |         |         |
| MGR                 | 27.39        | 2.14     | 25.79        | 1.83     | 27.17        | 2.24     | 25.99        | 2.10     | .384    | 0.999   |
| VGR                 | 8.65E+03     | 1.75E+03 | 8.50E+03     | 1.85E+03 | 8.56E+03     | 2.14E+03 | 8.39E+03     | 2.14E+03 | .996    | 0.999   |
| Skewness            | 8.36         | 2.28     | 8.69         | 2.04     | 8.04         | 2.47     | 8.26         | 2.79     | .965    | 0.999   |
| Kurtosis            | 149.96       | 73.40    | 158.00       | 66.21    | 138.16       | 78.94    | 146.34       | 91.03    | .971    | 0.999   |

**Note:**—SD5 indicates 5-neighborhood SD; SD9, 9-neighborhood SD; IQR, interquartile range; HGRE, high gray-level run emphasis; LGRE, low gray-level run emphasis; SRLGE, short-run low gray-level emphasis; SRHGE, short-run high gray-level emphasis; SRE, short-run emphasis; LRE, long-run emphasis; GLN, gray-level nonuniformity; RLN, run-length nonuniformity; LRLGE, long-run low gray-level emphasis; LRHGE, long-run high gray-level emphasis; MGR, mean gradients; VGR, variance of gradients.

**On-line Table 7: Texture parameters by scan type at 16-detector row CT**

|                     | Axial (n = 7) |          | Helical (n = 7) |          | P Value | Q Value |
|---------------------|---------------|----------|-----------------|----------|---------|---------|
|                     | Mean          | SD       | Mean            | SD       |         |         |
| <b>Histogram</b>    |               |          |                 |          |         |         |
| Mean                | 221.27        | 15.40    | 231.25          | 11.67    | .197    | 0.259   |
| Median              | 221.57        | 11.72    | 225.71          | 6.80     | .434    | 0.471   |
| SD                  | 150.92        | 22.99    | 152.21          | 23.31    | .919    | 0.919   |
| Range               | 47.13         | 2.84     | 42.64           | 1.31     | .003    | 0.006   |
| Geometric mean      | 190.27        | 14.70    | 206.49          | 10.56    | .035    | 0.062   |
| Harmonic mean       | 129.95        | 11.22    | 149.84          | 5.10     | .001    | 0.004   |
| 2nd SD              | 16.12         | 0.97     | 14.58           | 0.44     | .002    | 0.006   |
| SD5                 | 26.29         | 1.57     | 23.76           | 0.74     | .002    | 0.006   |
| SD9                 | 44.12         | 2.58     | 39.99           | 1.37     | .003    | 0.006   |
| 4th Moment          | 3.14E+09      | 1.77E+09 | 3.24E+09        | 1.56E+09 | .918    | 0.919   |
| IQR                 | 153.57        | 10.01    | 143.29          | 11.16    | .095    | 0.147   |
| Entropy             | 7.04          | 0.07     | 7.05            | 0.08     | .859    | 0.902   |
| Test                | 0.54          | 0.36     | 0.72            | 0.33     | .344    | 0.425   |
| <b>GLCM</b>         |               |          |                 |          |         |         |
| Entropy             | 1.21          | 0.08     | 1.14            | 0.10     | .171    | 0.232   |
| Contrast            | 2.21          | 0.24     | 1.96            | 0.19     | .051    | 0.085   |
| Correlation         | 0.98          | 0.002    | 0.98            | 0.002    | .071    | 0.114   |
| Energy              | 0.01          | 0.001    | 0.02            | 0.002    | .131    | 0.183   |
| Homogeneity         | 0.68          | 0.01     | 0.70            | 0.02     | .012    | 0.023   |
| <b>GLRL</b>         |               |          |                 |          |         |         |
| SRE                 | 0.07          | 0.003    | 0.06            | 0.01     | .004    | 0.008   |
| LRE                 | 0.07          | 0.004    | 0.06            | 0.01     | .004    | 0.008   |
| GLN                 | 0.07          | 0.003    | 0.06            | 0.005    | .002    | 0.005   |
| RLN                 | 0.07          | 0.004    | 0.06            | 0.01     | .003    | 0.006   |
| RP                  | 86.65         | 7.21     | 90.03           | 8.46     | .437    | 0.471   |
| LGRE                | 84.23         | 7.02     | 88.22           | 8.89     | .369    | 0.431   |
| HGRE                | 88.66         | 7.31     | 92.90           | 9.17     | .358    | 0.430   |
| SRLGE               | 84.74         | 7.08     | 88.31           | 7.95     | .392    | 0.445   |
| SRHGE               | 1.83E+04      | 1.93E+03 | 1.35E+04        | 1.22E+03 | .0001   | 0.001   |
| LRLGE               | 3.05E+04      | 3.04E+03 | 2.37E+04        | 1.76E+03 | .0003   | 0.001   |
| LRHGE               | 1.78E+04      | 1.99E+03 | 1.32E+04        | 926.28   | .0001   | 0.001   |
| <b>Law features</b> |               |          |                 |          |         |         |
| L1                  | 2.64E+05      | 1.58E+04 | 2.31E+05        | 5.91E+03 | .0002   | 0.001   |
| L2                  | 1.76E+04      | 829.55   | 1.56E+04        | 312.58   | <.0001  | 0.001   |
| L3                  | 7.59E+03      | 412.90   | 6.57E+03        | 187.63   | <.0001  | 0.001   |
| L4                  | 6.08E+04      | 3.35E+03 | 5.26E+04        | 1.16E+03 | <.0001  | 0.001   |
| L5                  | 2.77E+03      | 120.06   | 2.55E+03        | 67.97    | .001    | 0.004   |
| L6                  | 1.25E+03      | 14.18    | 1.23E+03        | 6.85     | .001    | 0.003   |
| L7                  | 1.77E+03      | 87.85    | 1.57E+03        | 46.55    | .0002   | 0.001   |
| L8                  | 4.34E+03      | 66.12    | 4.19E+03        | 42.91    | .0004   | 0.002   |
| L9                  | 3.35E+04      | 1.93E+03 | 2.88E+04        | 783.34   | <.0001  | 0.001   |
| <b>GLGM</b>         |               |          |                 |          |         |         |
| MGR                 | 29.43         | 2.65     | 25.35           | 3.42     | .028    | 0.052   |
| VGR                 | 9.22E+03      | 2.20E+03 | 7.93E+03        | 2.10E+03 | .282    | 0.359   |
| Skewness            | 7.23          | 2.00     | 9.26            | 2.41     | .112    | 0.162   |
| Kurtosis            | 110.18        | 60.68    | 178.94          | 84.50    | .106    | 0.159   |

**Note:**—SD5 indicates 5-neighborhood SD; SD9, 9-neighborhood SD; IQR, interquartile range; HGRE, high gray-level run emphasis; LGRE, low gray-level run emphasis; SRLGE, short-run low gray-level emphasis; SRHGE, short-run high gray-level emphasis; SRE, short-run emphasis; LRE, long-run emphasis; GLN, gray-level nonuniformity; RLN, run-length nonuniformity; LRLGE, long-run low gray-level emphasis; LRHGE, long-run high gray-level emphasis; MGR, mean gradients; VGR, variance of gradients.



**On-line Table 8: Texture parameters by scan type at 64-detector row CT**

|                     | Axial (n = 7) |          | Helical (n = 7) |          | P Value | Q Value |
|---------------------|---------------|----------|-----------------|----------|---------|---------|
|                     | Mean          | SD       | Mean            | SD       |         |         |
| <b>Histogram</b>    |               |          |                 |          |         |         |
| Mean                | 219.82        | 13.32    | 222.81          | 17.47    | .725    | 0.762   |
| Median              | 219.86        | 9.30     | 218.14          | 11.19    | .761    | 0.779   |
| SD                  | 152.85        | 22.17    | 147.36          | 28.07    | .692    | 0.745   |
| Range               | 52.76         | 2.64     | 46.79           | 2.87     | .002    | 0.005   |
| Geometric mean      | 188.31        | 12.17    | 197.38          | 15.78    | .251    | 0.369   |
| Harmonic mean       | 127.41        | 6.92     | 141.97          | 7.88     | .003    | 0.008   |
| 2nd SD              | 18.04         | 0.91     | 15.99           | 0.97     | .002    | 0.005   |
| SD5                 | 29.31         | 1.47     | 25.95           | 1.56     | .001    | 0.004   |
| SD9                 | 48.49         | 2.39     | 42.96           | 2.55     | .001    | 0.004   |
| 4th Moment          | 3.56E+09      | 1.61E+09 | 3.07E+09        | 1.84E+09 | .608    | 0.672   |
| IQR                 | 153.29        | 11.12    | 144.71          | 13.82    | .225    | 0.364   |
| Entropy             | 6.96          | 0.10     | 7.00            | 0.11     | .467    | 0.559   |
| Test                | 0.52          | 0.27     | 0.52            | 0.35     | .986    | 0.986   |
| <b>GLCM</b>         |               |          |                 |          |         |         |
| Entropy             | 1.15          | 0.07     | 1.20            | 0.10     | .255    | 0.369   |
| Contrast            | 2.44          | 0.26     | 2.23            | 0.26     | .161    | 0.271   |
| Correlation         | 0.98          | 0.003    | 0.98            | 0.003    | .239    | 0.369   |
| Energy              | 0.02          | 0.001    | 0.02            | 0.002    | .527    | 0.598   |
| Homogeneity         | 0.67          | 0.01     | 0.68            | 0.01     | .032    | 0.067   |
| <b>GLRL</b>         |               |          |                 |          |         |         |
| SRE                 | 0.08          | 0.005    | 0.07            | 0.01     | .002    | 0.006   |
| LRE                 | 0.08          | 0.005    | 0.07            | 0.01     | .001    | 0.003   |
| GLN                 | 0.08          | 0.004    | 0.06            | 0.01     | .001    | 0.004   |
| RLN                 | 0.08          | 0.004    | 0.07            | 0.01     | .001    | 0.003   |
| RP                  | 77.93         | 10.70    | 84.18           | 12.48    | .335    | 0.426   |
| LGRE                | 75.46         | 10.38    | 81.69           | 11.73    | .314    | 0.412   |
| HGRE                | 79.00         | 10.25    | 85.38           | 11.68    | .299    | 0.405   |
| SRLGE               | 75.44         | 10.19    | 82.02           | 11.74    | .285    | 0.399   |
| SRHGE               | 1.73E+04      | 1.28E+03 | 1.53E+04        | 2.36E+03 | .063    | 0.120   |
| LRLGE               | 2.84E+04      | 1.49E+03 | 2.57E+04        | 3.88E+03 | .126    | 0.220   |
| LRHGE               | 1.69E+04      | 1.07E+03 | 1.48E+04        | 2.19E+03 | .041    | 0.081   |
| <b>Law features</b> |               |          |                 |          |         |         |
| L1                  | 3.06E+05      | 1.55E+04 | 2.66E+05        | 1.41E+04 | .0003   | 0.002   |
| L2                  | 2.40E+04      | 915.74   | 2.08E+04        | 777.47   | <.0001  | 0.001   |
| L3                  | 1.01E+04      | 480.82   | 8.70E+03        | 371.65   | <.0001  | 0.001   |
| L4                  | 7.46E+04      | 3.34E+03 | 6.45E+04        | 2.84E+03 | <.0001  | 0.001   |
| L5                  | 3.83E+03      | 171.48   | 3.40E+03        | 115.48   | .0001   | 0.001   |
| L6                  | 1.47E+03      | 31.27    | 1.38E+03        | 19.14    | <.0001  | 0.001   |
| L7                  | 2.55E+03      | 121.83   | 2.21E+03        | 87.39    | <.0001  | 0.001   |
| L8                  | 4.50E+03      | 84.01    | 4.34E+03        | 79.31    | .003    | 0.007   |
| L9                  | 4.12E+04      | 2.01E+03 | 3.56E+04        | 1.67E+03 | .0001   | 0.001   |
| <b>GLGM</b>         |               |          |                 |          |         |         |
| MGR                 | 28.69         | 1.95     | 25.79           | 1.83     | .014    | 0.031   |
| VGR                 | 1.02E+04      | 1.77E+03 | 8.50E+03        | 1.85E+03 | .114    | 0.207   |
| Skewness            | 8.01          | 1.27     | 8.69            | 2.04     | .469    | 0.559   |
| Kurtosis            | 136.79        | 38.91    | 158.00          | 66.21    | .479    | 0.559   |

**Note:**—SD5 indicates 5-neighborhood SD; SD9, 9-neighborhood SD; IQR, interquartile range; HGRE, high gray-level run emphasis; LGRE, low gray-level run emphasis; SRLGE, short-run low gray-level emphasis; SRHGE, short-run high gray-level emphasis; SRE, short-run emphasis; LRE, long-run emphasis; GLN, gray-level nonuniformity; RLN, run-length nonuniformity; LRLGE, long-run low gray-level emphasis; LRHGE, long-run high gray-level emphasis; MGR, mean gradients; VGR, variance of gradients.
